# Supplementary material for: Long-Term Exposure to Low-Dose Di-(2-ethylhexyl) Phthalate Impairs Cholesterol Metabolism in Hepatic Stellate Cells and Exacerbates Liver Librosis
Source: PubMed Central journal article supplement (PMC7312183; doi:10.3390/ijerph17113802), 2020-05-27
Supplement: ijerph-17-03802-s001.pdf [file ijerph-17-03802-s001.pdf]

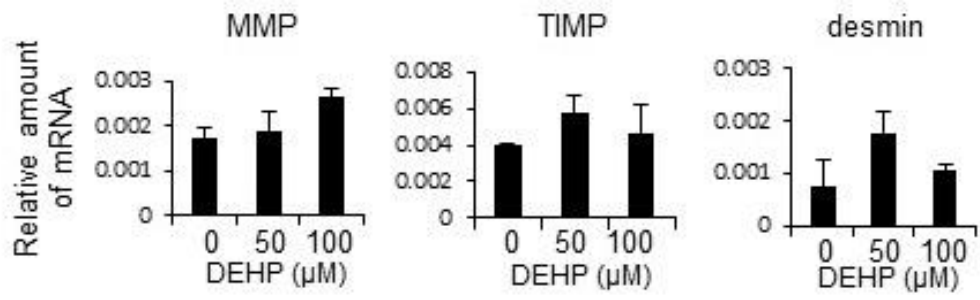

**Supplementary Figure 1.** Q-PCR analysis of MMP2, TIMP, and desmin in long-term, low-dose DEHP exposed HSC-T6 cells.
